# Supplementary material for: The Association between Lead Exposure and Bone Mineral Density in Childhood and Adolescence: Results from NHANES 1999–2006 and 2011–2018
Source: MDPI journal article supplement (doi:10.3390/nu14071523), 2022-04-06

## Supplementary Materials

**Table S1** Sensitive analysis for physical activity and dietary on BMDs (n=2116, 2011-2018, 8-11 years old)

| BMD      | Model 1 |        |            | Model 2 |        |            |
|----------|---------|--------|------------|---------|--------|------------|
|          | F       | P      | R-sq.(adj) | F       | P      | R-sq.(adj) |
| Total    | 4.829   | <0.001 | 0.516      | 4.068   | 0.0164 | 0.521      |
| Subtotal | 8.397   | <0.001 | 0.676      | 6.18    | <0.001 | 0.681      |
| Limbs    | 11.51   | <0.001 | 0.693      | 8.528   | <0.001 | 0.698      |
| Lumbar   | 0.609   | 0.382  | 0.435      | 1.612   | 0.137  | 0.439      |

# In model 1, age, sex, race/ethnicity, height, weight, family income to poverty ratio and blood cadmium were adjusted.

In model 2, variables in model 1 plus physical activity and dietary calcium and vitamin D intake were adjusted.

**Figure S1** Multivariate models for ln transformed BLLs on total BMD, subtotal BMD, limbs BMD and lumbar spine BMD. In model 1 (a): Age, sex, race/ethnicity, height, weight, family income to poverty ratio and blood cadmium were adjusted. In model 2 (b): Variables in model 1 plus physical activity and dietary calcium and vitamin D intake were adjusted.

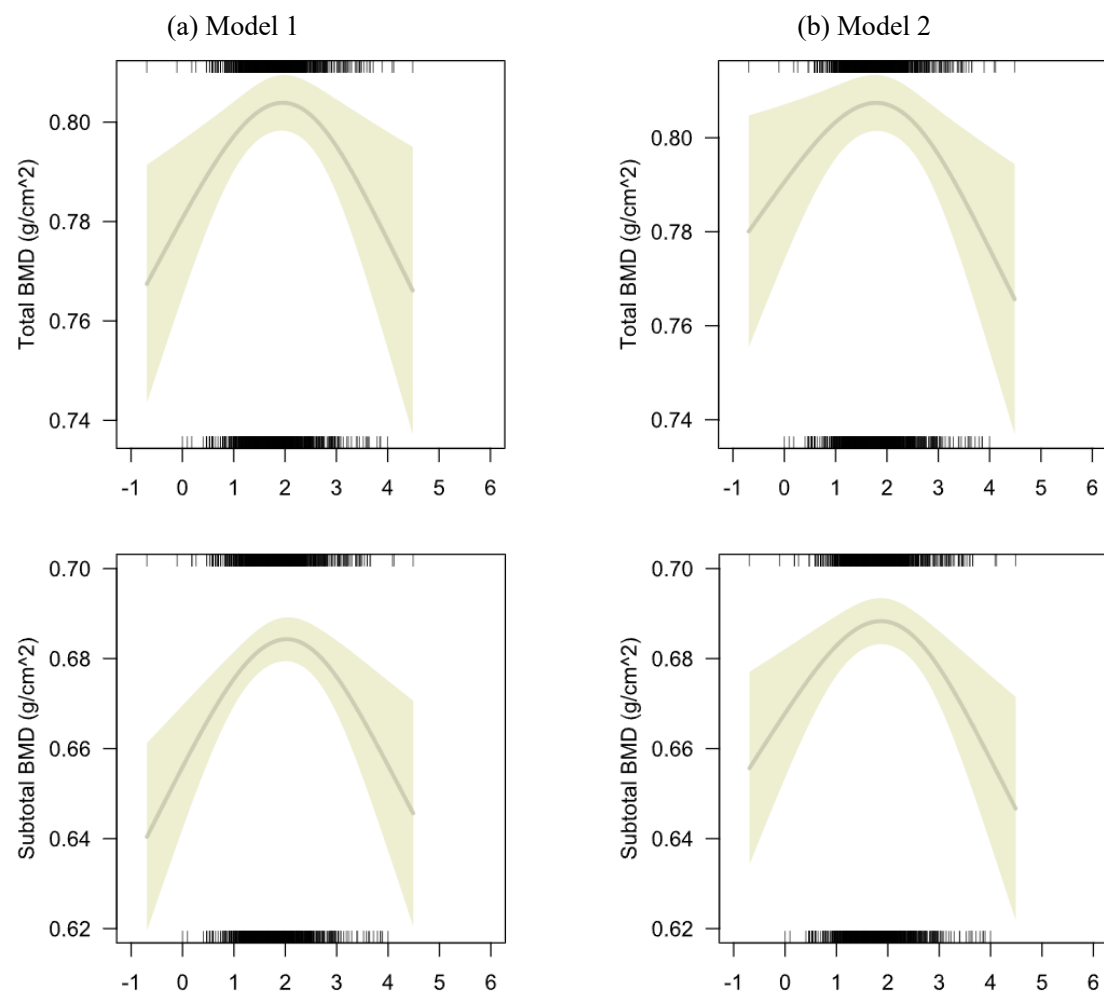

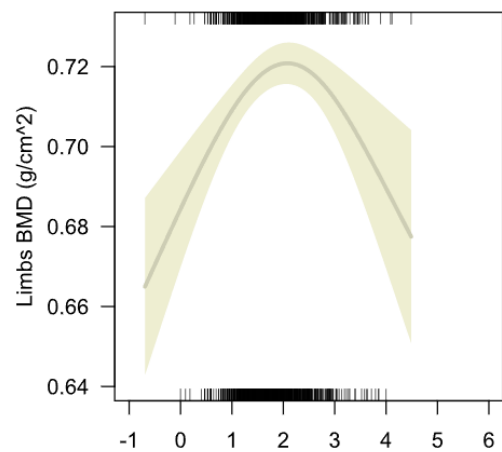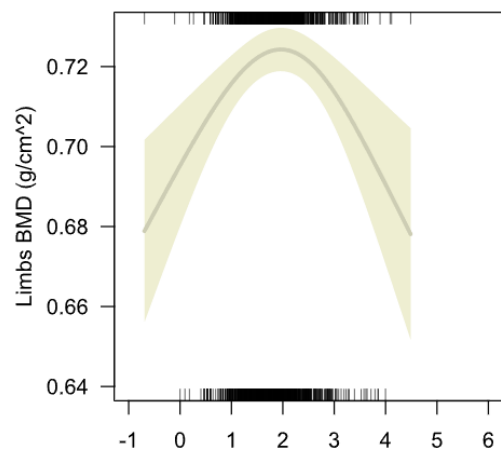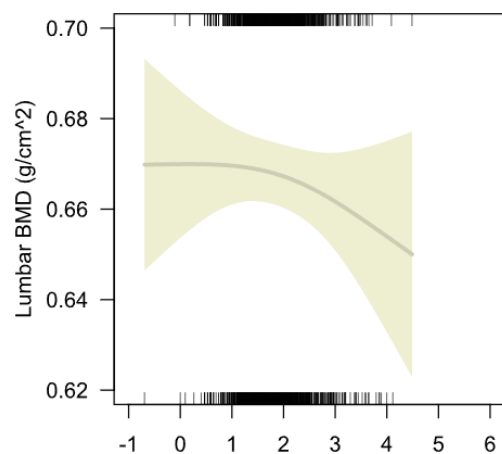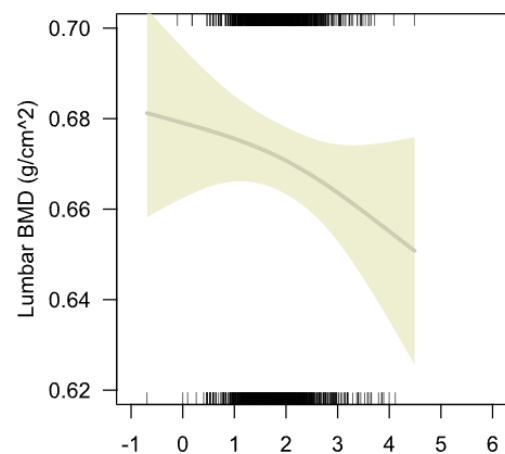

Supplement: s1 [file s1]
